# Supplementary material for: Myocardial Oxygen Consumption and Efficiency in Aortic Valve Stenosis Patients With and Without Heart Failure
Source: PubMed Central journal article supplement — J Am Heart Assoc. 2017 Feb 6;6(2):e004810. doi: 10.1161/JAHA.116.004810 (PMC5523773; doi:10.1161/jaha.116.004810), 2017-02-06
Supplement: JAH3-6-e004810-s001.pdf [file JAH3-6-e004810-s001.pdf]

**SUPPLEMENTAL MATERIAL**

**TABLE S1. PATIENTS GROUPS ACCORDING TO AORTIC VALVE CHARACTERISTICS**

|                             | Aortic valve area index (cm <sup>2</sup> /m <sup>2</sup> ) |                 |                  |                  |                     | p      |
|-----------------------------|------------------------------------------------------------|-----------------|------------------|------------------|---------------------|--------|
|                             | Controls                                                   | >0.52           | 0.46-0.52        | 0.36-0.45        | <0.36               |        |
| MEE, %                      | 21.0 ± 1.6                                                 | 20.7 ± 3.6      | 21.7 ± 3.4       | 22.4 ± 3.6       | 21.1 ± 5.3          | 0.76   |
| MVO <sub>2</sub> , mL/min/g | 0.105 ± 0.020                                              | 0.122 ± 0.028   | 0.106 ± 0.021    | 0.119 ± 0.026    | 0.122 ± 0.030       | 0.26   |
| GLS, %                      | -19 ± 2                                                    | -19 ± 3         | -16 ± 2          | -17 ± 3          | -13 ± 4             | <0.001 |
| NT-proBNP, ng/L             | 31<br>(23-74)                                              | 88<br>(34-2111) | 149<br>(50-1343) | 256<br>(53-2026) | 1030<br>(46-12677)  | <0.001 |
|                             | Mean gradient (mmHg)                                       |                 |                  |                  |                     | p      |
|                             | Controls                                                   | <24.6           | 24.6-33.2        | 33.3-47.6        | >47.6               |        |
| MEE, %                      | 21.0 ± 1.6                                                 | 20.2 ± 3.3      | 22.1 ± 3.6       | 23.0 ± 4.2       | 20.5 ± 4.7          | 0.23   |
| MVO <sub>2</sub> , mL/min/g | 0.105 ± 0.020                                              | 0.114 ± 0.027   | 0.118 ± 0.029    | 0.114 ± 0.021    | 0.125 ± 0.030       | 0.42   |
| GLS, %                      | -19 ± 2                                                    | -17 ± 3         | -18 ± 3          | -15 ± 3          | -13 ± 3             | <0.001 |
| NT-proBNP, ng/L             | 31<br>(23-74)                                              | 74<br>(38-2111) | 149<br>(34-401)  | 300<br>(46-1243) | 1169<br>(112-12677) | <0.001 |

*Patients with aortic valve stenosis (n=58) were subdivided into 4 groups according to interquartile range of aortic valve area index and mean gradient, respectively. Values are mean ± SD. N-terminal pro-B-type natriuretic peptide (NT-proBNP) is presented as median (interquartile range). Global longitudinal strain (GLS). Myocardial external efficiency (MEE). Myocardial oxygen consumption (MVO<sub>2</sub>).*

**TABLE S2. PARADOXICAL LOW FLOW, LOW GRADIENT VS. NORMAL FLOW AS**

|                                            | NFHG (n=14)   | NFLG (n=21)   | P-LFLG (n=8)  | p      |
|--------------------------------------------|---------------|---------------|---------------|--------|
| MEE, %                                     | 22.9 ± 3.4    | 23.3 ± 3.4    | 19.3 ± 1.7*†  | 0.01   |
| EW, mmHg x mL/min x 10 <sup>3</sup>        | 884 ± 213     | 661 ± 165     | 442 ± 815*†   | <0.001 |
| Total MVO <sub>2</sub> , mL/min            | 26.1 ± 6.8    | 19.3 ± 5.8    | 15.3 ± 2.9*   | <0.001 |
| MVO <sub>2</sub> , mL/min/g                | 0.124 ± 0.029 | 0.116 ± 0.025 | 0.104 ± 0.016 | 0.19   |
| NYHA class I/II/III/IV, n                  | 7/6/1/0       | 20/1/0/0      | 7/0/1/0       | 0.02   |
| NT-proBNP, ng/L                            | 463 (46-2379) | 127 (53-682)  | 82 (50-401)*  | 0.003  |
| AVA index, cm <sup>2</sup> /m <sup>2</sup> | 0.3 ± 0.1     | 0.5 ± 0.1     | 0.5 ± 0.1*    | <0.001 |
| GLS, %                                     | -15 ± 3       | -18 ± 2       | -17 ± 2*      | 0.002  |
| LVEF, %                                    | 67 ± 7        | 71 ± 5        | 71 ± 5        | 0.26   |
| LV mass index, g/m <sup>2</sup>            | 109 ± 24      | 87 ± 19       | 75 ± 11*      | <0.001 |
| EDV index, mL/m <sup>2</sup>               | 84 ± 20       | 72 ± 13       | 51 ± 5*†      | <0.001 |
| ESV index, mL/m <sup>2</sup>               | 28 ± 11       | 21 ± 7        | 15 ± 3*†      | <0.001 |
| Cardiac index, L/m <sup>2</sup> /min       | 3.1 ± 0.5     | 2.8 ± 0.5     | 2.0 ± 0.2*†   | <0.001 |
| Concentric remodeling <sup>  </sup>        | 1.3 ± 0.2     | 1.2 ± 0.2     | 1.5 ± 0.3†    | 0.02   |

*Values are mean ± SD. \*p < 0.05 vs. normal flow, high gradient (NFHG). †p < 0.05 vs. normal flow, low gradient (NFLG). Paradoxical low flow, low gradient (P-LFLG). N-terminal pro-B-type natriuretic peptide (NT-proBNP) is presented as median (interquartile range). ||Concentric remodeling = LV mass/ EDV. Aortic valve area (AVA). End-diastolic volume (EDV). End-systolic volume (ESV). Global longitudinal strain (GLS). Left ventricle (LV). Left ventricular ejection fraction (LVEF). Mechanical external work (EW). Myocardial external efficiency (MEE). Myocardial blood flow (MBF). Myocardial oxygen consumption (MVO<sub>2</sub>).*
